# Supplementary material for: In situ synthesis of an Al and V co-doped TiO2 NTA interlayer-enhanced PbO2 composite for efficient zinc electrowinning
Source: Royal Society of Chemistry journal article supplement (doi:10.1039/d4nr03085k), 2024-10-30
Supplement: d4nr03085k1.pdf [file d4nr03085k1.pdf]

## Materials and chemicals

All chemicals are analytical and can be used without further purification. TC4 titanium alloy plates (Ti-6%Al-4%V) and pure titanium plates purchased from Baoti Group Co., Ltd. (Shaanxi, China) are both for direct use in industrial-grade products. **Table.S1** chemicals and corporation

| chemical                                                  |                                |
|-----------------------------------------------------------|--------------------------------|
| Absolute ethyl alcohol (C <sub>2</sub> H <sub>6</sub> O), | Aladdin Ltd. (Shanghai, China) |
| Acetone (C <sub>3</sub> H <sub>6</sub> O)                 | Aladdin Ltd. (Shanghai, China) |
| Ethylene glycol (EG, (CH <sub>2</sub> OH) <sub>2</sub> )  | Aladdin Ltd. (Shanghai, China) |
| Ammonium fluoride (NH <sub>4</sub> F)                     | Aladdin Ltd. (Shanghai, China) |
| Sulfuric acid (H <sub>2</sub> SO <sub>4</sub> )           | Aladdin Ltd. (Shanghai, China) |
| Lead nitrate(Pb(NO <sub>3</sub> ) <sub>2</sub> )          | Aladdin Ltd. (Shanghai, China) |

## Pre-treatment of the titanium sheet

Pure plates and TC4 plates are cut into small pieces in the size of 20 mm x 10 mm x 1 mm. The pre-processing step is divided into two steps. First, the potassium alloy plate is immersed in a mixed solution of HF+HNO<sub>3</sub>+H<sub>2</sub>O with a volume ratio of 1: 2: 10-15s, and the surface oxide layer is removed by chemical polishing. Then, the titanium alloy tablets use ethanol, the ionic water is removed by ultrasound for 5 mins, the number of times is three, remove the surface oil dirt. Finally, the titanium alloy plate is stored in an ethanol solution for reserve use.

## Preparation of ZrO<sub>2</sub>-Co<sub>3</sub>O<sub>4</sub> Mixed Oxide Powder

ZrO<sub>2</sub>-Co<sub>3</sub>O<sub>4</sub> compound oxide powder is prepared using the solution-gel method.

First, the citric acid (5.6g, 0.03 mol) and the Zr(NO<sub>3</sub>)<sub>4</sub> · 5H<sub>2</sub>O(4.2932 g, 0.01 mol) are dissolved in deionized water and added Co(NO<sub>3</sub>)<sub>2</sub> · 6H<sub>2</sub>O(2.9103 g, 0.01 mol). The resulting solution is heated for 12 hours in a dryer at 160 ° C to obtain a precursor.

The black is then transferred to the maffar furnace, in the air, to burn at 700 ° C for 12 hours at a heating rate of 2 ° C/min. Finally, with the use of acrylic, grind, remove impurities, wash, and obtain the target powder.

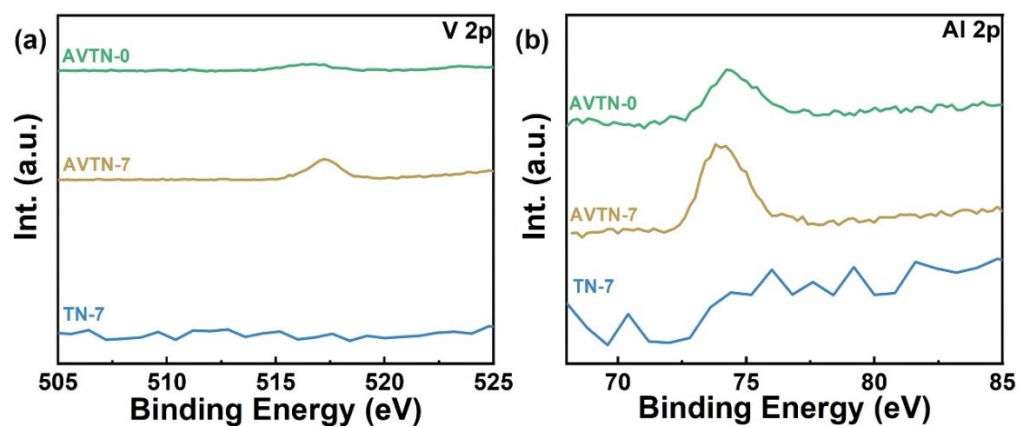

Figure.S1 The XPS spectra of (a) V 2p of AVTN-0,AVTN-7 and TN-7, (b) Al 2p of AVTN-0,AVTN-7 and TN-7

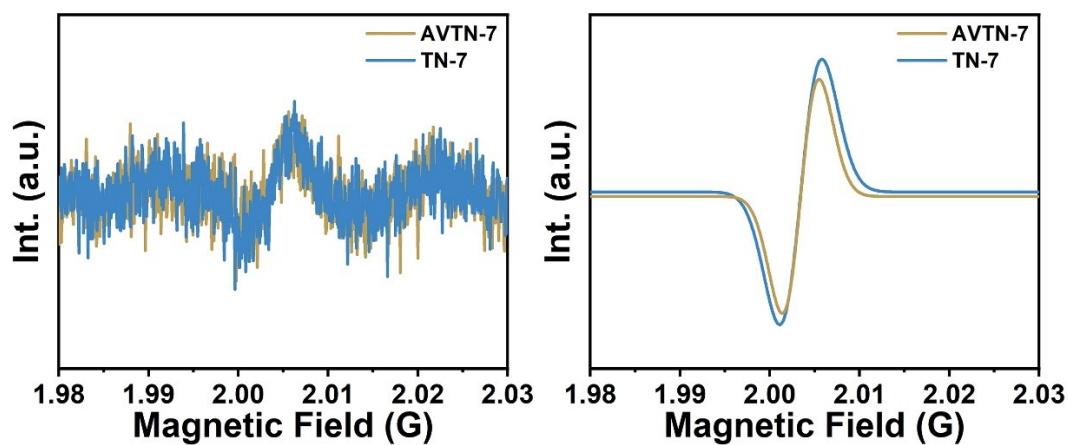

Figure S2 the EPR of AVTN-7and TN-7

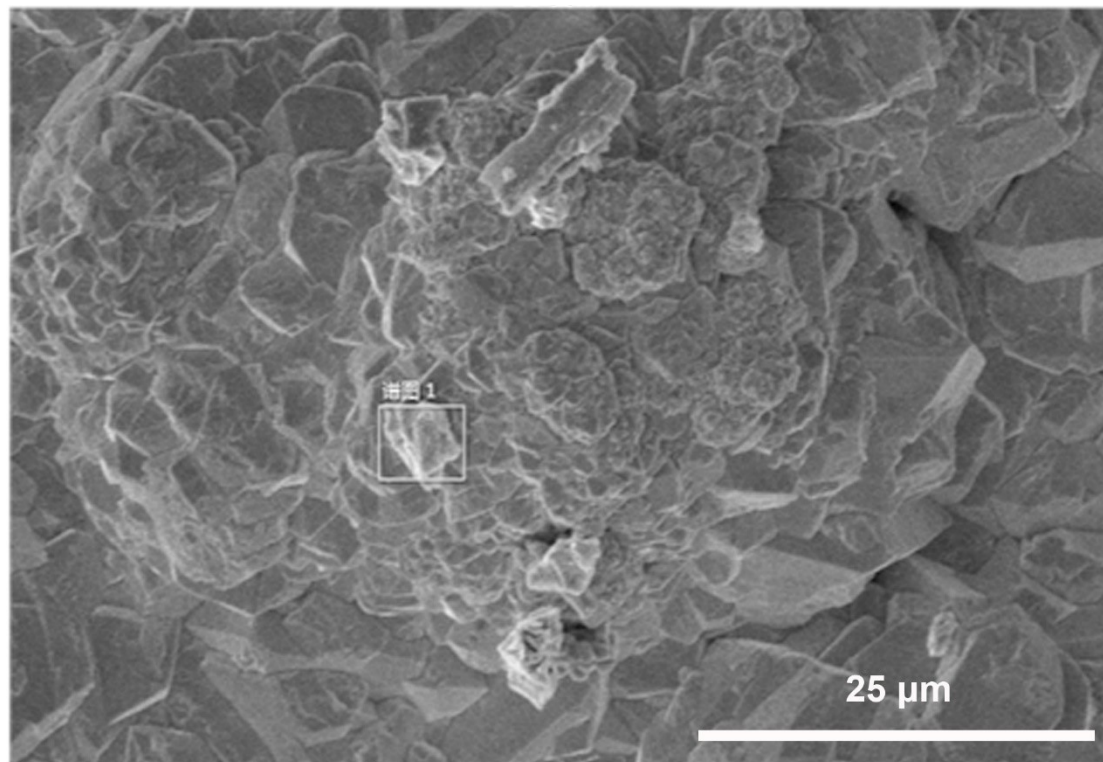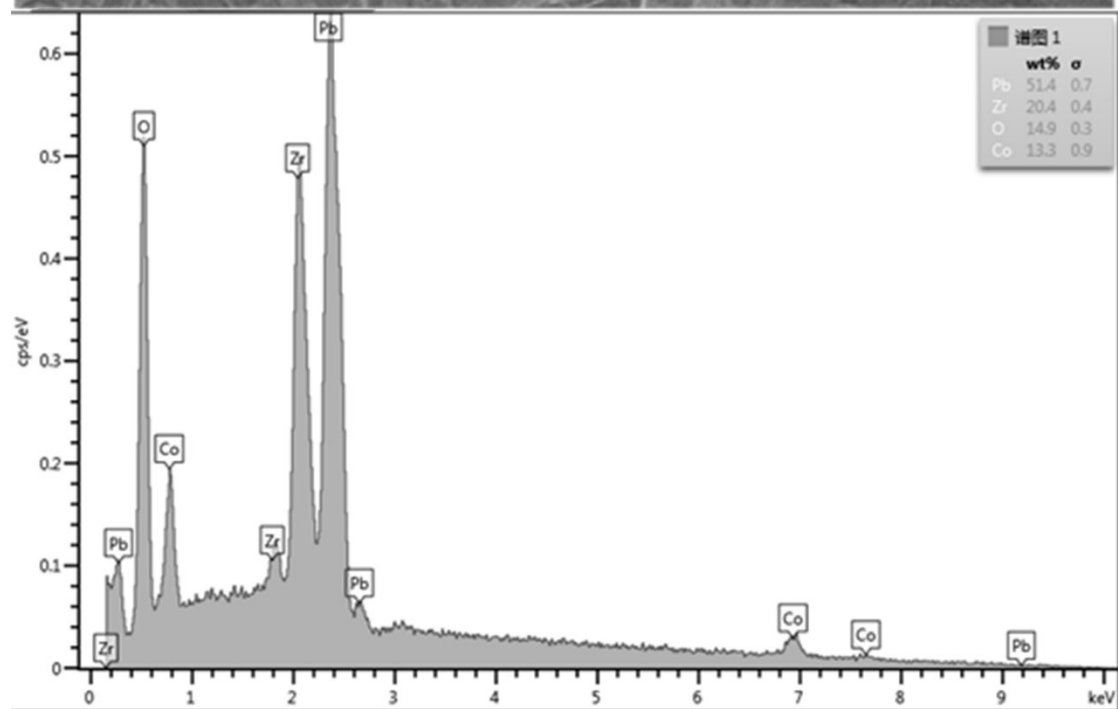

**Figure S3** the EDS of TC4/AVTN-7/ZrO<sub>2</sub>-Co<sub>3</sub>O<sub>4</sub>-PbO<sub>2</sub>

**Table S1** the R<sub>ct1</sub> and R<sub>ct2</sub> of different electrodes

| Electrode                                                                     | R <sub>ct1</sub> (ohm/cm <sup>2</sup> ) | R <sub>ct2</sub> (ohm/cm <sup>2</sup> ) |
|-------------------------------------------------------------------------------|-----------------------------------------|-----------------------------------------|
| TC4/AVTN-7/ZrO <sub>2</sub> -Co <sub>3</sub> O <sub>4</sub> -PbO <sub>2</sub> | 3.004                                   | 0.5521                                  |
| TC4/AVTN-7/PbO <sub>2</sub>                                                   | 20.48                                   | 0.7562                                  |
| TC4/PbO <sub>2</sub>                                                          | 0.07823                                 | 22.35                                   |
| Ti4/PbO <sub>2</sub>                                                          | 123                                     | 9.402                                   |

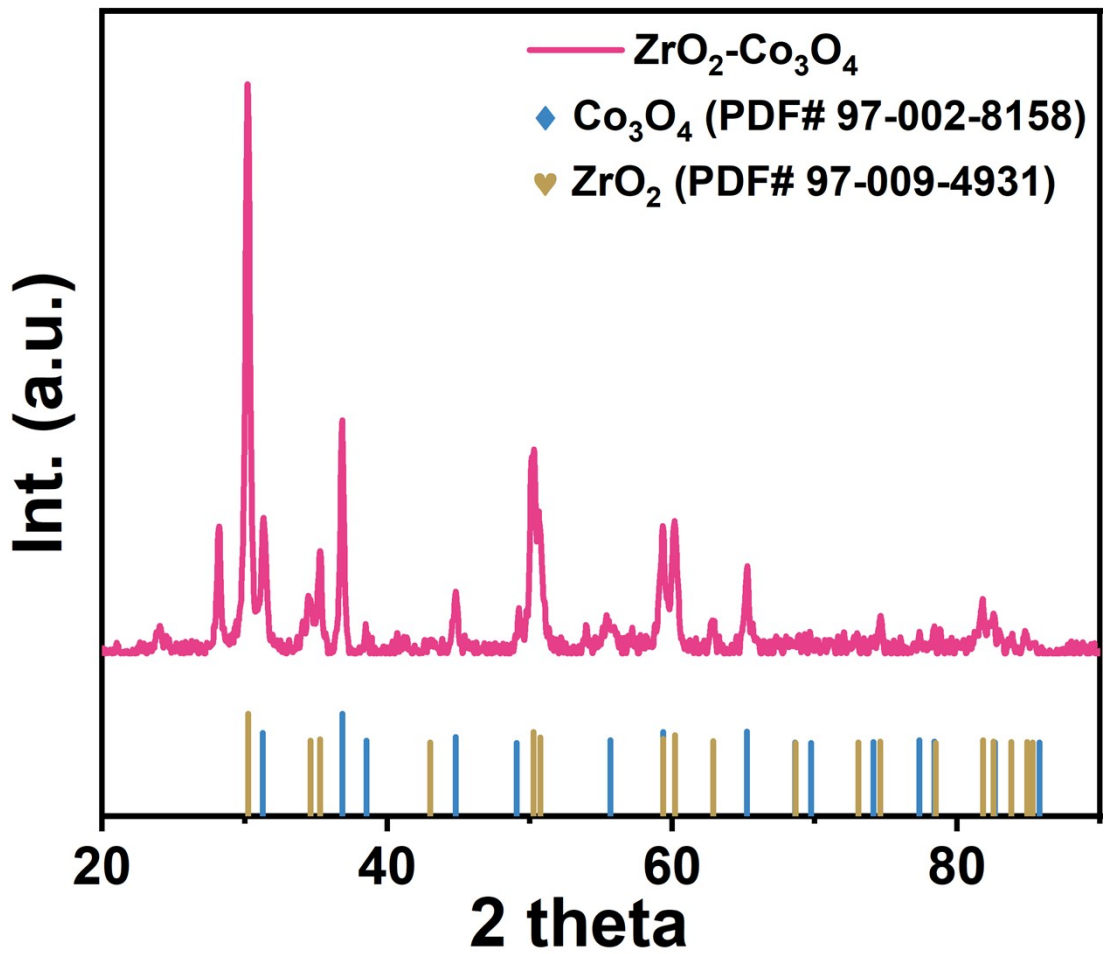

Figure S4 the XRD pattern of  $\text{ZrO}_2\text{-Co}_3\text{O}_4$  powder

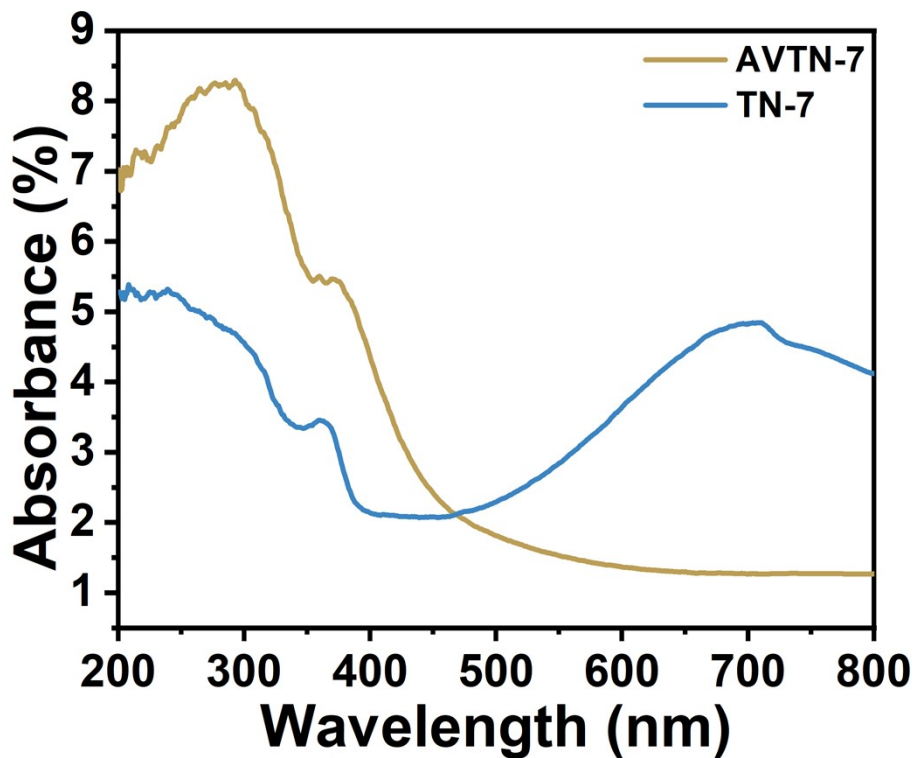

Figure S5 the UV absorption spectroscopy of AVTN-7 and TN-7

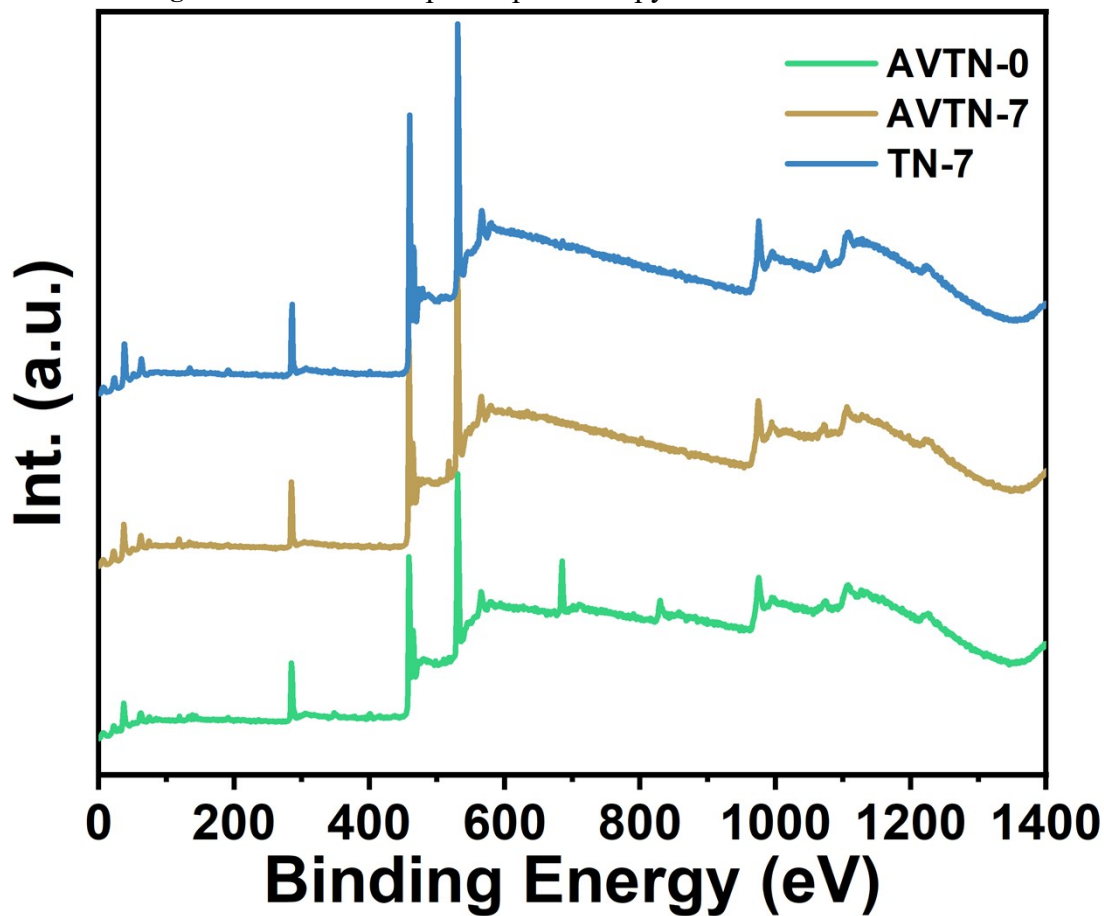

Figure S6 the XPS spectras of AVTN-0, AVTN-7 and TN-7

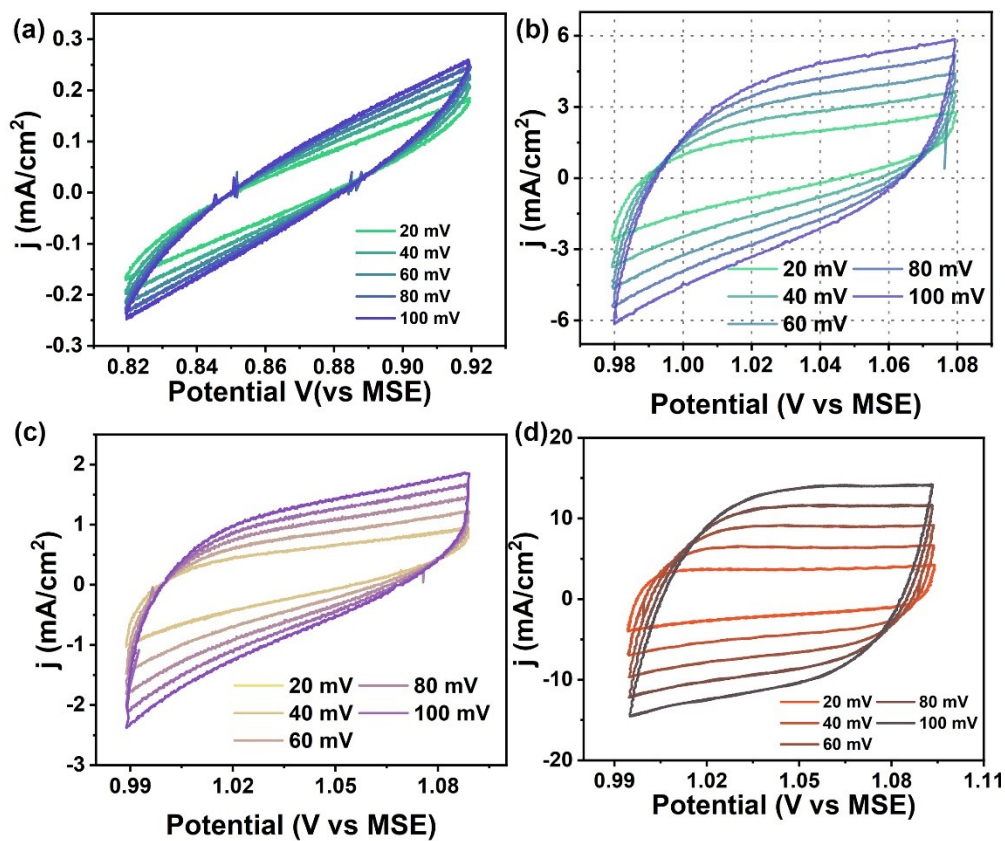

Figure S7 the CV curves of different electrodes

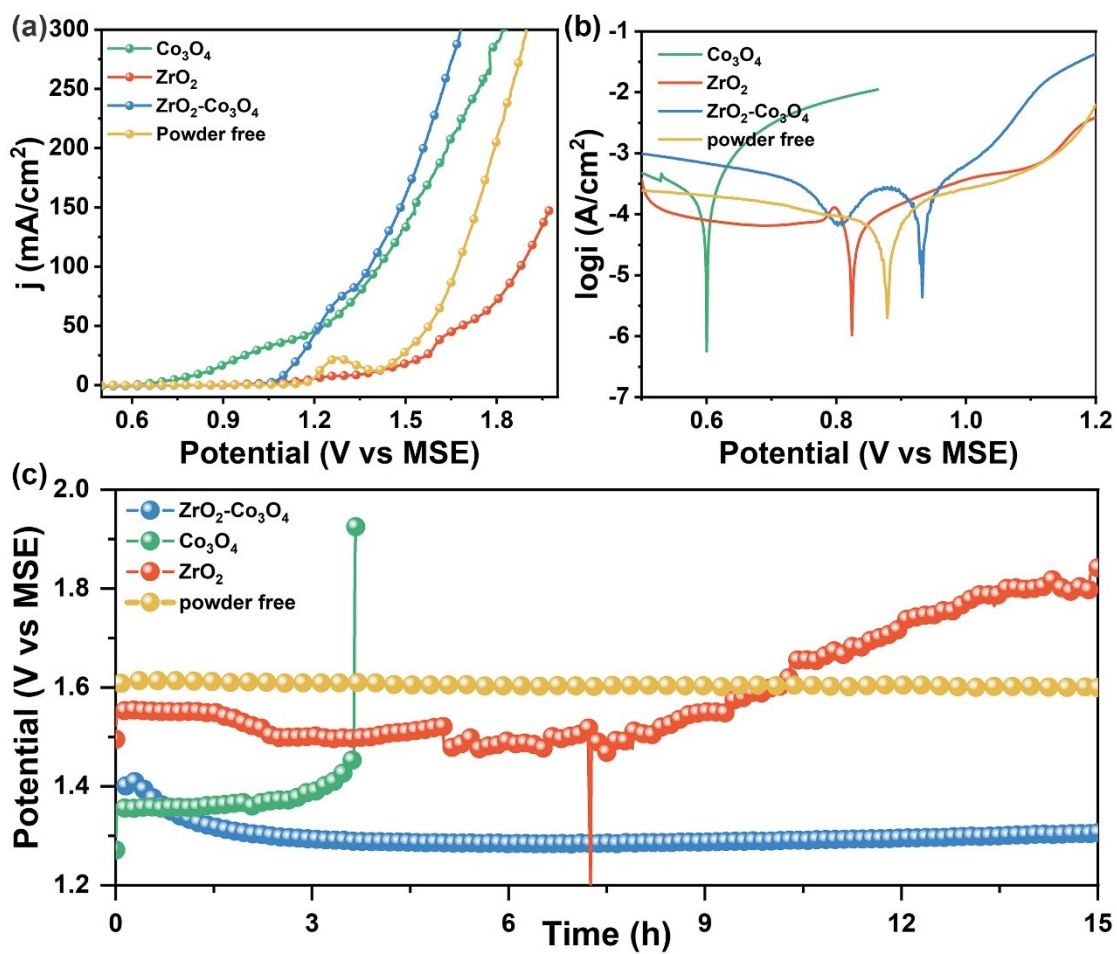

Figure S8 Electrochemical performance testing of the  $\text{ZrO}_2$ ,  $\text{Co}_3\text{O}_4$ , and  $\text{ZrO}_2\text{-Co}_3\text{O}_4$

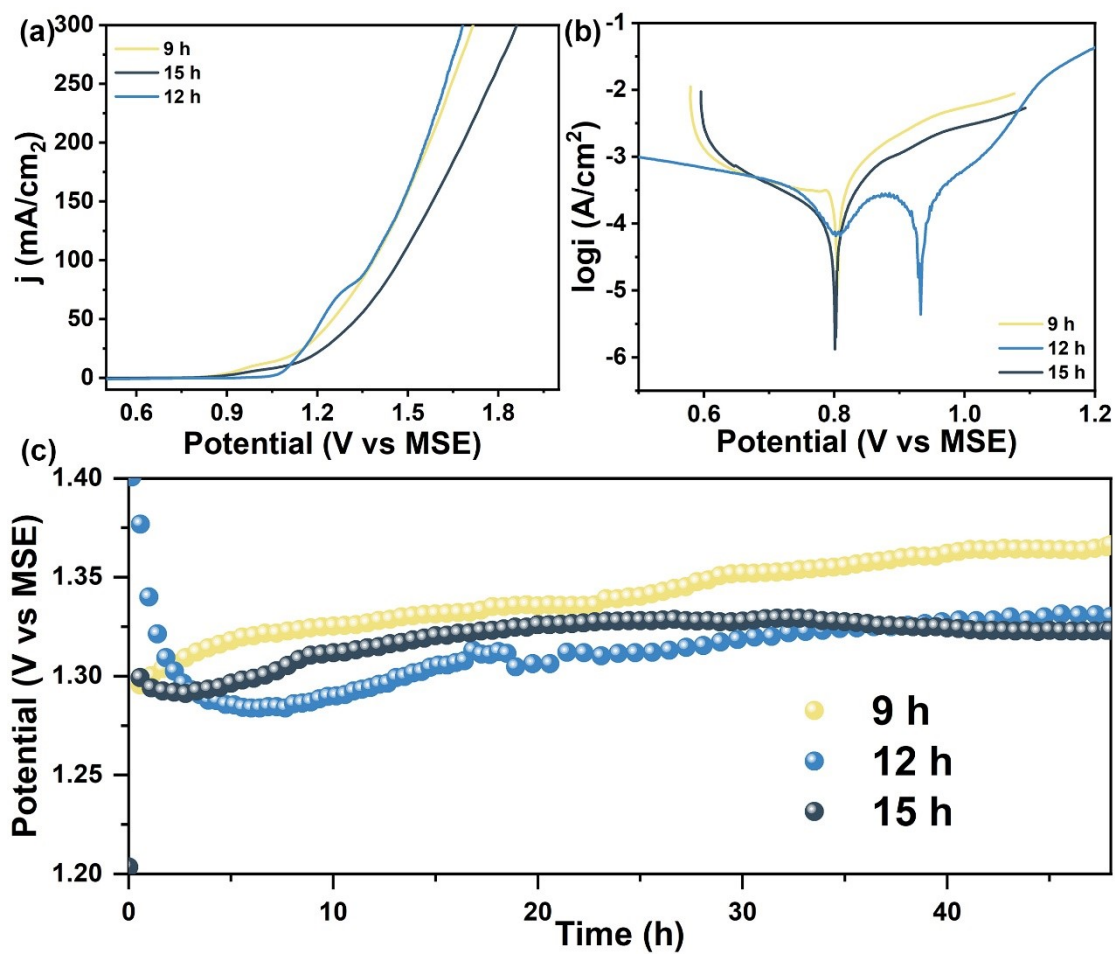

Figure S9 Electrochemical properties of powders annealed over time

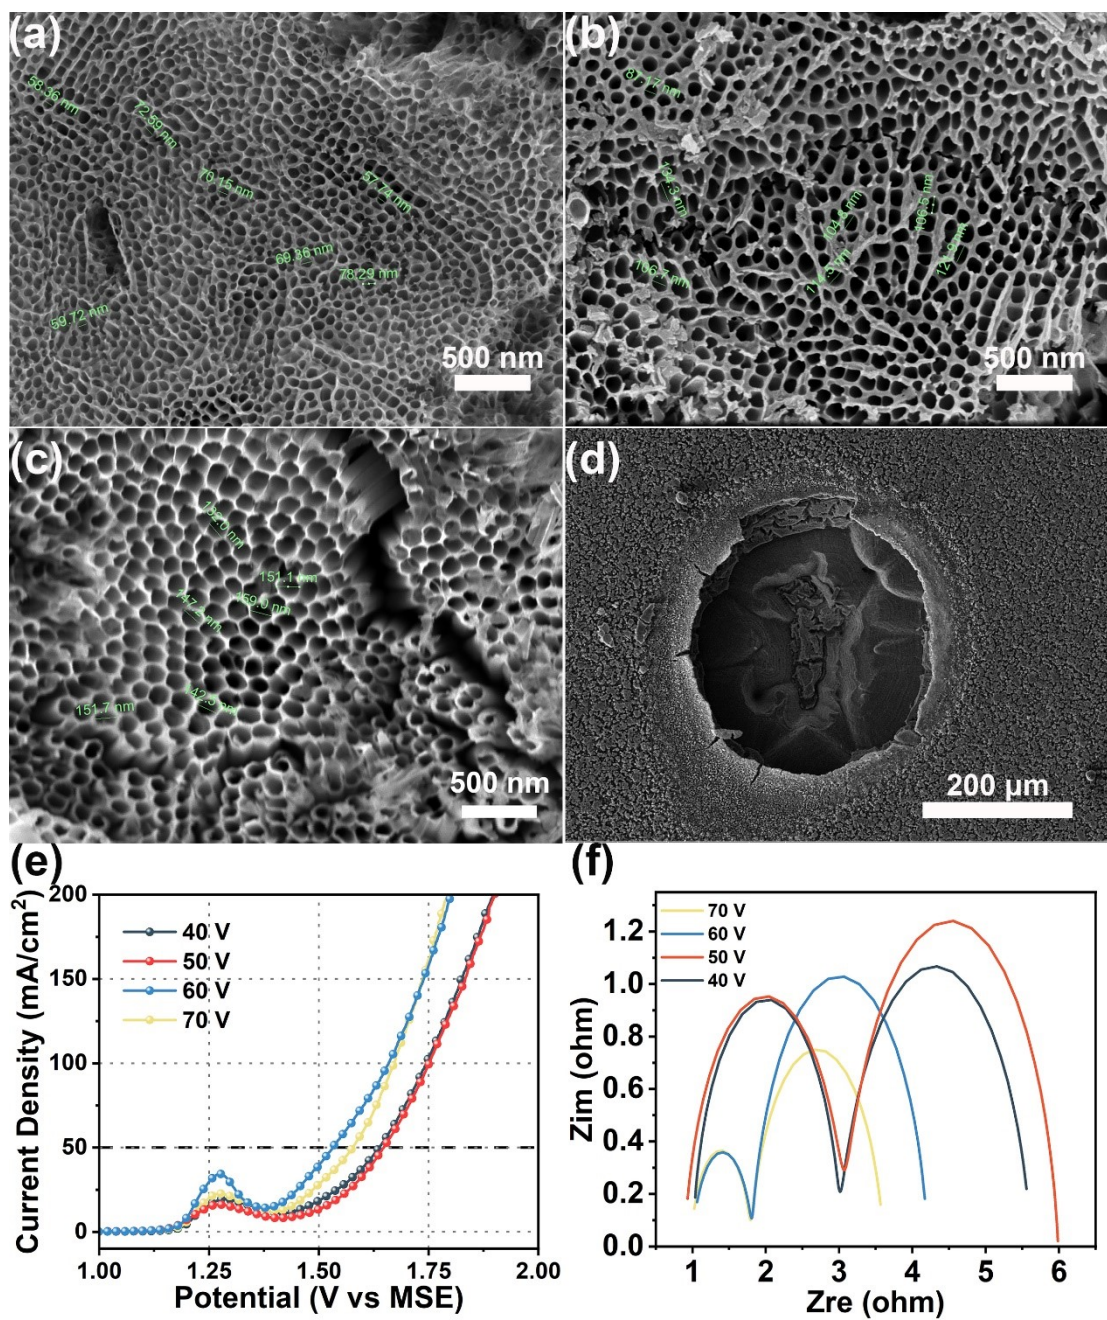

**Figure S10** the SEM images of nanotubes at different oxidation voltages (a) 40 V;(b)50 V ;(c)60 V;(d)70 V;(e)(f)The LSV curves and Tafel plot of nanotubes at different oxidation voltages



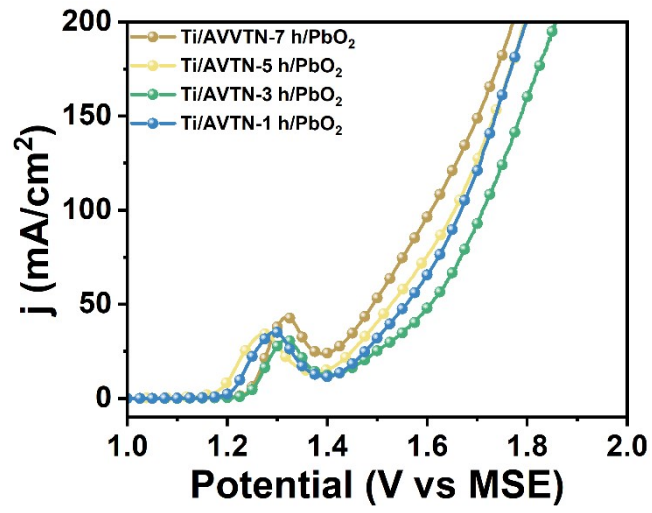

**Figure S11** Electrochemical properties of AVTN-1, AVTN-3, AVTN-5 and AVTN-7
